# Supplementary material for: Antibiotic and Metal Resistance in Escherichia coli Isolated from Pig Slaughterhouses in the United Kingdom
Source: Antibiotics (Basel). 2020 Oct 28;9(11):746. doi: 10.3390/antibiotics9110746 (PMC7692696; doi:10.3390/antibiotics9110746)
Supplement: Supplementary file 1 [file antibiotics-09-00746-s001.xlsx]

## Sheet: Sheet1
Table S1 All 81 strains information.
														Phenotypic resistances													Genes detected
				Re-confirmation				Colistin sulfate by agar dilution			mercury		silver	copper					EAggEC	antibiotic					mercury			silver			copper
StrainID	Original ID in Wei (2012)	Collection site	recovery	TBX	indole	oxdiase		8mg/L			25µg/ml	50µg/ml	400µM	7mM	8mM	9mM	10mM		astA	blaTEM	blaSHV	blaCTX-M	blaOXA-1	mcr-1	merA	merC	intl1	silA	silB	silE	pcoE
1	EAggEC11BP1	Belly - pre singe	Yes	Blue	Positive	Negative		S			S	S	S	R	R	R	S		+
2	EAggEC8BP4	Belly - pre singe	Yes	Blue	Positive	Negative		S			S	S	S	R	R	S	S		+
3	EAggEC6BP5	Belly - pre singe	Yes	Blue	Positive	Negative		S			S	S	S	R	R	R	S
4	EAggEC7BP4	Belly - pre singe	Yes	Blue	Positive	Negative		S			S	S	S	R	R	R	S		+	+							+
5	EAggEC6BP3	Belly - pre singe	Yes	Blue	Positive	Negative		S			S	S	S	R	R	S	S		+
6	EAggEC8BP1	Belly - pre singe	Yes	Blue	Positive	Negative		S			S	S	S	R	R	S	S
7	EAggEC7BP5	Belly - pre singe	Yes	Blue	Positive	Negative		S			S	S	S	R	R	R	S		+	+							+
8	EAggEC9BP3	Belly - pre singe	Yes	Blue	Negatvie	Negative		S			S	S	S	R	R	S	S		+
9	EAggEC9AP1	Anus - pre singe	Yes	Blue	Positive	Negative		S			R	S	R	R	R	R	S		+						+	+		+	+	+
10	EAggEC8BP5	Belly - pre singe	Yes	Blue	Positive	Negative		S			R	R	R	R	R	S	S		+						+	+	+
11	EAggEC10BP3	Belly - pre singe	Yes	Blue	Positive	Negative		S			S	S	S	R	S	S	S		+
12	EAggEC10BP1	Belly - pre singe	Yes	Blue	Positive	Negative		S			S	S	R	R	R	S	S		+									+	+	+
13	EAggEC9BP1	Belly - pre singe	Yes	Blue	Positive	Negative		S			S	S	R	R	S	S	S		+									+	+	+
14	EAggEC5AP4	Anus - pre singe	Yes	Blue	Positive	Negative		S			R	S	R	R	S	S	S		+						+	+	+	+	+	+	+
15	EAggEC9AP5	Anus - pre singe	Yes	Blue	Positive	Negative		S			R	S	R	R	R	R	S		+						+	+		+	+	+
16	EAggEC9AP3	Anus - pre singe	Yes	Blue	Positive	Negative		S			S	S	R	S	S	S	S		+
17	EAggEC8AP4	Anus - pre singe	Yes	Blue	Positive	Negative		S			S	S	R	R	R	R	S											+	+	+
18	EAggEC8BP2	Belly - pre singe	Yes	Blue	Positive	Negative		S			S	S	S	R	R	R	S		+
19	EAggEC12AP4	Anus - pre singe	Yes	Blue	Positive	Negative		S			S	S	R	R	R	S	S		+
20	EAggEC12AP1	Anus - pre singe	Yes	Blue	Positive	Negative		S			S	S	S	R	S	S	S		+
21	EAggEC10AP1	Anus - pre singe	Yes	Blue	Positive	Negative		S			R	S	R	R	R	R	S		+						+	+		+	+	+
22	EAggEC12AP5	Anus - pre singe	Yes	Blue	Positive	Negative		S			S	S	S	R	R	S	S		+
23	EAggEC 11AP3	Anus - pre singe	Yes	Blue	Positive	Negative		S			R	S	R	R	R	R	S		+						+	+		+	+	+
24	EAggEC 11AP4	Anus - pre singe	Yes	Blue	Positive	Negative		S			R	S	R	R	R	R	S		+						+	+		+	+	+
25	EAggEC9AP2	Anus - pre singe	Yes	Blue	Positive	Negative		S			R	S	R	R	R	R	S		+						+	+		+	+	+
26	EAggEC13AP3	Anus - pre singe	Yes	Blue	Positive	Negative		S			S	S	S	R	R	S	S		+
27	EAggEC10AP2	Anus - pre singe	Yes	Blue	Positive	Negative		S			S	S	R	S	S	S	S		+									+	+	+
28	EAggEC10AP1	Anus - pre singe	Yes	Blue	Positive	Negative		S			S	S	R	R	R	S	S		+
29	EAggEC12AP2	Anus - pre singe	Yes	Blue	Positive	Negative		S			S	S	S	R	S	S	S		+
30	EAggEC12AP3	Anus - pre singe	Yes	Blue	Positive	Negative		S			S	S	S	R	S	S	S		+
31	EAggEC14AP3	Anus - pre singe	Yes	Blue	Positive	Negative		S			S	S	S	R	S	S	S		+
32	EAggEC13AP1	Anus - pre singe	Yes	Blue	Positive	Negative		S			S	S	S	R	R	S	S		+
33	EAggEC13AP2	Anus - pre singe	Yes	Blue	Positive	Negative		S			S	S	S	R	R	S	S		+
34	EAggEC14AP4	Anus - pre singe	Yes	Blue	Positive	Negative		S			S	S	S	R	R	S	S		+
35	EAggEC15AP3	Anus - pre singe	Yes	Blue	Positive	Negative		S			R	S	R	R	R	S	S		+
36	EAggEC14AP1	Anus - pre singe	Yes	Blue	Positive	Negative		S			S	S	S	R	R	S	S		+
37	EAggEC4AO2	Anus - post polish	Yes	Blue	Positive	Negative		S			S	S	S	R	R	S	S		+
38	EAggEC5AO2	Anus - post polish	Yes	Blue	Positive	Negative		S			R	R	S	R	R	R	S		+						+	+
39	EAggEC4AO4	Anus - post polish	Yes	Blue	Positive	Negative		S			S	S	R	R	R	S	S		+
40	EAggEC4AO5	Anus - post polish	Yes	Blue	Positive	Negative		S			S	S	S	R	R	S	S		+
41	EAggEC5AO1	Anus - post polish	Yes	Blue	Positive	Negative		S			R	R	S	R	R	R	S		+						+	+
42	EAggEC4AO3	Anus - post polish	Yes	Blue	Positive	Negative		S			S	S	R	R	S	S	S		+
43	EAggEC3AO4	Anus - post polish	Yes	Blue	Positive	Negative		S			S	S	R	R	R	R	R		+
44	EAggEC3AO5	Anus - post polish	Yes	Blue	Positive	Negative		S			S	S	S	R	S	S	S		+
45	EAggEC14AP5	Anus - pre singe	Yes	Blue	Positive	Negative		S			S	S	S	R	S	S	S		+
46	EAggEC4AO1	Anus - post polish	Yes	Blue	Positive	Negative		S			S	S	S	R	S	S	S		+
47	EAggEC5AO5	Anus - post polish	Yes	Blue	Positive	Negative		S			S	S	S	R	S	S	S		+
48	EAggEC5AO3	Anus - post polish	Yes	Blue	Positive	Negative		S			R	R	S	R	R	R	S		+						+	+
49	EAggEC3AO3	Anus - post polish	Yes	Blue	Positive	Negative		S			S	S	R	R	S	S	S		+
50	EAggEC10AO1	Anus - post polish	Yes	Blue	Positive	Negative		S			S	S	R	R	R	S	S		+									+	+	+	+
51	EAggEC8AO4	Anus - post polish	Yes	Blue	Positive	Negative		S			S	S	S	R	R	S	S
52	EAggEC10AO4	Anus - post polish	Yes	Blue	Positive	Negative		S			S	S	R	R	R	R	S		+
53	EAggEC7AO2	Anus - post polish	Yes	Blue	Positive	Negative		S			S	S	S	R	R	S	S		+
54	EAggEC7AO1	Anus - post polish	Yes	Blue	Positive	Negative		S			S	S	S	R	S	S	S		+
55	EAggEC12AS5	Anus - post singe	Yes	Blue	Positive	Negative		S			S	S	S	R	R	R	S		+
56	EAggEC2AS4	Anus - post singe	Yes	Blue	Positive	Negative		S			S	S	S	R	R	R	S		+
57	EAggEC5AS2	Anus - post singe	Yes	Blue	Positive	Negative		S			R	R	S	R	R	R	S		+						+	+
58	EAggEC2AS3	Anus - post singe	Yes	Blue	Positive	Negative		S			S	S	S	R	R	R	S		+
59	EAggEC5AS1	Anus - post singe	Yes	Blue	Positive	Negative		S			R	S	S	R	R	R	S		+						+	+
60	EAggEC8AO3	Anus - post polish	No
61	EAggEC10AO3	Anus - post polish	Yes	Blue	Positive	Negative		S			S	S	R	R	S	S	S			+					+	+
62	EAggEC12AO3	Anus - post polish	Yes	Blue	Positive	Negative		S			S	S	R	R	S	S	S		+									+	+	+
63	EAggEC12AO4	Anus - post polish	Yes	Blue	Positive	Negative		S			S	S	R	R	S	S	S		+									+	+	+	+
64	EAggEC13AS2	Anus - post singe	Yes	Blue	Positive	Negative		S			S	S	S	R	R	S	S		+
65	EAggEC12AS4	Anus - post singe	Yes	Blue	Positive	Negative		S			S	S	S	R	R	S	S		+
66	EAggEC13AS5	Anus - post singe	Yes	Blue	Positive	Negative		S			S	S	S	R	R	S	S		+
67	EAggEC12AS3	Anus - post singe	Yes	Blue	Positive	Negative		S			S	S	R	R	R	S	S		+
68	EAggEC12AS2	Anus - post singe	Yes	Blue	Positive	Negative		S			S	S	S	R	S	S	S		+
69	EAggEC12AS1	Anus - post singe	Yes	Blue	Negative	Negative		S			S	S	R	R	R	R	S
70	EAggEC11AS5	Anus - post singe	Yes	Blue	Positive	Negative		S			R	S	R	R	R	R	S								+	+		+	+	+
71	EAggEC15AO3	Anus - post polish	Yes	Blue	Positive	Negative		S			S	S	S	R	S	S	S		+
72	EAggEC15AO2	Anus - post polish	Yes	Blue	Positive	Negative		S			S	S	S	R	R	R	S		+
73	EAggEC14AS5	Anus - post singe	Yes	Blue	Positive	Negative		S			S	S	S	R	R	R	S		+
74	EAggEC14AS2	Anus - post singe	Yes	Blue	Positive	Negative		S			S	S	R	R	S	S	S		+									+	+	+	+
75	EAggEC14AS1	Anus - post singe	Yes	Blue	Positive	Negative		S			S	S	R	R	S	S	S		+									+	+	+	+
76	EAggEC15AS3	Anus - post singe	Yes	Blue	Positive	Negative		S			S	S	S	R	R	R	S		+
77	EAggEC15AS1	Anus - post singe	Yes	Blue	Negatvie	Negative		S			S	S	R	R	R	R	S											+	+	+	+
78	EAggEC13AO3	Anus - post polish	Yes	Blue	Positive	Negative		S			S	S	R	R	R	R	R		+									+	+	+	+
79	EAggEC14AO3	Anus - post polish	Yes	Blue	Positive	Negative		S			S	S	S	R	R	S	S		+
80	EAggEC13AS2	Anus - post singe	Yes	Blue	Positive	Negative		S			S	S	R	S	S	S	S		+
81	EAggEC15AO1	Anus - post polish	Yes	Blue	Positive	Negative		S			S	S	R	R	S	S	S		+
Negatvie control strain								E. coli ATCC 25922			E. coli J53	E. coli J53	E. coli J53	E. coli ED8739	E. coli ED8739	E. coli ED8739	E. coli ED8739		E. coli ATCC 25922	E. coli ATCC 25922	E. coli ATCC 25922	E. coli ATCC 25922	E. coli ATCC 25922	E. coli ATCC 25922	E. coli J53	E. coli J53	E. coli J53	E. coli J53	E. coli J53	E. coli J53	E. coli ED8739
Postive control strain			E. coli ATCC 25922	E. coli ATCC 25922	E. coli ATCC 25922	E. coli ATCC 25922		E.coli NCTC 13846			E. coli pMG101	E. coli pMG101	E. coli pMG101	E. coli pRJ1004	E. coli pRJ1004	E. coli pRJ1004	E. coli pRJ1004		E. coli H10407	E. coli NCTC13352	Klebsiella pneumoniae NCTC 13368	E. coli NCTC 13353	E. coli A2.5	E. coli NCTC 13846	E. coli pMG101	E. coli pMG101	E. coli pMG101	E. coli pMG101	E. coli pMG101	E. coli pMG101	E. coli pRJ1004
